# Supplementary material
Source: MDPI journal article supplement (https://www.mdpi.com/2071-1050/15/7/6004)
Supplement: s1 [file s1]

## Supplementary Material – Table S1

ONS - Detailed household expenditure by disposable income decile group

UK, financial year ending 2018

### Commodity or service

|        |                                                      |       |     |
|--------|------------------------------------------------------|-------|-----|
| 1      | Food & non-alcoholic drinks                          | 61.00 | 11% |
| 2.1    | Alcoholic drinks                                     | 8.80  | 2%  |
| 3.1    | Clothing                                             | 19.90 | 3%  |
| 3.2    | Footwear                                             | 4.80  | 1%  |
| 4.1    | Actual rentals for housing                           | 50.10 | 9%  |
| 4.2    | Maintenance and repair of dwelling                   | 8.20  | 1%  |
| 4.3    | Water supply and miscellaneous services              | 9.30  | 2%  |
| 4.4    | Electricity, gas and other fuels                     | 22.60 | 4%  |
| 5      | Household goods & services*                          | 40.90 | 7%  |
| 6      | Health                                               | 7.00  | 1%  |
| 7.1    | Purchase of vehicles                                 | 27.90 | 5%  |
| 7.2    | Operation of personal transport                      | 33.60 | 6%  |
| 7.3    | Transport services (rail, bus, etc.)                 | 19.70 | 3%  |
| 8      | Communication (post, phone, internet)                | 17.90 | 3%  |
| 9.1    | Audio-visual, photographic and information           | 5.20  | 1%  |
| 9.3.1  | Games, toys and hobbies                              | 3.10  | 1%  |
| 9.3.2  | Computer software and games                          | 1.10  | 0%  |
| 9.3.3  | Equipment for sport, camping and open-air recreation | 1.10  | 0%  |
| 9.3.4  | Horticultural goods, garden equipment and plants     | 2.60  | 0%  |
| 9.3.5  | Pets and pet food                                    | 5.70  | 1%  |
| 9.4.1  | Sports admissions, subscriptions, leisure class fees | 6.60  | 1%  |
| 9.4.2  | Cinema, theatre and museums etc.                     | 3.20  | 1%  |
| 9.4.3  | TV, video, satellite rental, cable subscriptions     | 7.00  | 1%  |
| 9.4.4  | Miscellaneous entertainments                         | 1.30  | 0%  |
| 9.4.5  | Development of film, deposit for film development,   | 0.30  | 0%  |
| 9.4.6  | Gambling payments                                    | 2.60  | 0%  |
| 9.5    | Newspapers, books and stationery                     | 5.40  | 1%  |
| 9.6.1  | Package holidays - UK                                | 1.70  | 0%  |
| 9.6.2  | Package holidays - abroad                            | 25.20 | 4%  |
| 10     | Education                                            | 8.70  | 2%  |
| 11.1.1 | Restaurant and café meals                            | 18.80 | 3%  |
| 11.1.2 | Alcoholic drinks (away from home)                    | 8.20  | 1%  |
| 11.1.3 | Take away meals eaten at home                        | 5.20  | 1%  |
| 11.1.4 | Other take-away and snack food                       | 5.20  | 1%  |
| 11.1.5 | Contract catering (food) and canteens                | 2.00  | 0%  |
| 11.2.1 | Holiday in the UK                                    | 6.00  | 1%  |
| 11.2.2 | Holiday abroad                                       | 4.70  | 1%  |
| 12.1   | Personal care: hair dressing, products toileteries   | 12.60 | 2%  |
| 12.2   | Personal effects                                     | 4.10  | 1%  |
| 12.3   | Social protection                                    | 4.40  | 1%  |

|                          |                                                         |       |              |
|--------------------------|---------------------------------------------------------|-------|--------------|
| 12.4.1                   | Household insurances - structural, contents, appliances | 4.60  | 1%           |
| 12.4.2                   | Medical insurance premiums                              | 2.00  | 0%           |
| 12.4.3                   | Vehicle insurance including boat insurance              | 10.80 | 2%           |
| 12.4.4                   | Non-package holiday, other travel insurance             | 0.30  | 0%           |
| 13.1                     | Housing: mortgage interest payments, council tax        | 46.60 | 8%           |
| 13.3                     | Holiday spending                                        | 12.40 | 2%           |
| 13.4                     | Money transfers and credit                              | 13.80 | 2%           |
| <b>Total expenditure</b> |                                                         |       | <b>575.7</b> |

*Source: Office for National Statistics*

|                                                  |        |
|--------------------------------------------------|--------|
| Weighted number of households (thousands)        | 27,150 |
| Total number of households in sample             | 5,410  |
| Total number of persons in sample                | 12,780 |
| Total number of adults in sample                 | 9,940  |
| Weighted average number of persons per household | 2.4    |
