# Supplementary material
Source: MDPI journal article supplement (https://www.mdpi.com/2071-1050/15/7/6004)
Supplement: s1 [file s1]

## Supplementary Material – Table S1

### SIC Categories and GHG emissions – re-spend selection

|   |                                               |
|---|-----------------------------------------------|
| 2 | Possible link                                 |
| 3 | Tourism                                       |
| 4 | Clothes                                       |
| 5 | Food (and drink)                              |
|   | Clear area of interest (energy, water, waste) |

| SIC(07) group          | Section |                                                                                                       | GHGs     |   |
|------------------------|---------|-------------------------------------------------------------------------------------------------------|----------|---|
| 6                      | B       | Crude petroleum and natural gas                                                                       | 19,889.8 | 2 |
| 20.14+20.16+20.17+20.6 | C       | Manufacture of petrochemicals                                                                         | 6,195.7  | 2 |
| 26                     | C       | Computer, electronic, communication and optical products                                              | 769.5    | 2 |
| 27                     | C       | Electrical equipment                                                                                  | 750.0    | 2 |
| 29                     | C       | Motor vehicles, trailers and semi-trailers                                                            | 1,483.3  | 2 |
| 33.16                  | C       | Repair & maintenance of aircraft & spacecraft                                                         | 39.7     | 2 |
| 35.2-3                 | D       | Manufacture of gas; distribution of gaseous fuels through mains and steam and air conditioning supply | 5,853.5  | 2 |
| 45                     | G       | Wholesale and retail trade and repair services of motor vehicles and motorcycles                      | 2,099.3  | 2 |
| 46                     | G       | Wholesale trade services, except of motor vehicles and motorcycles                                    | 7,399.8  | 2 |
| 47                     | G       | Retail trade services, except of motor vehicles and motorcycles                                       | 6,556.9  | 2 |
| 49.1-2                 | H       | Rail transport                                                                                        | 2,131.2  | 2 |
| 49.31/9 + 49.39        | H       | Buses, coaches, trams and similar public urban transport n.e.c                                        | 3,970.0  | 2 |
| 49.31/1                | H       | Underground, metro other non interurban rail services                                                 | 12.7     | 2 |
| 49.32                  | H       | Taxis and other renting of private cars with driver                                                   | 3,495.6  | 2 |
| 49.4                   | H       | Freight transport by road and removal services                                                        | 12,329.8 | 2 |
| 50                     | H       | Water transport services                                                                              | 11,017.4 | 2 |
| 51                     | H       | Air transport services                                                                                | 42,877.3 | 2 |
| 100                    |         | Consumer expenditure - not travel                                                                     | 79,596.4 | 2 |
| 30.1                   | C       | Building of ships and boats                                                                           | 227.3    | 3 |
| 30.3                   | C       | Manufacture of air and spacecraft and related machinery                                               | 492.4    | 3 |
| 30.2+4+9               | C       | Manufacture of other transport equipment, excluding ships, boats, air and spacecraft                  | 120.8    | 3 |
| 33.15                  | C       | Repair & maintenance of ships                                                                         | 12.0     | 3 |
| 55                     | I       | Accommodation services                                                                                | 923.5    | 3 |
| 79                     | N       | Travel agency, tour operator and other reservation services and related services                      | 147.2    | 3 |
| 101                    |         | Consumer expenditure - travel                                                                         | 68,091.5 | 3 |
| 13                     | C       | Textiles                                                                                              | 1,026.8  | 4 |
| 14                     | C       | Wearing apparel                                                                                       | 309.1    | 4 |
| 15                     | C       | Leather and related products                                                                          | 36.8     | 4 |
| 19.2                   | C       | Manufacture of refined petroleum products                                                             | 13,833.4 | 4 |

|            |   |                                                                                    |            |   |
|------------|---|------------------------------------------------------------------------------------|------------|---|
| 20.5       | C | Manufacture of other chemical products & man-made fibres                           | 580.7      | 4 |
| 1          | A | Products of agriculture, hunting and related services                              | 47,765.4   | 5 |
| 3          | A | Fish and other fishing products; aquaculture products; support services to fishing | 724.2      | 5 |
| 10.1       | C | Processing and preserving of meat and production of meat products                  | 1,042.5    | 5 |
| 10.2-3     | C | Processing and preserving of fish, crustaceans, molluscs, fruit and vegetables     | 1,051.7    | 5 |
| 10.4       | C | Manufacture of vegetable and animal oils and fats                                  | 95.4       | 5 |
| 10.5       | C | Manufacture of dairy products                                                      | 899.5      | 5 |
| 10.6       | C | Manufacture of grain mill products, starches and starch products                   | 680.2      | 5 |
| 10.7       | C | Manufacture of bakery and farinaceous products                                     | 1,363.0    | 5 |
| 10.8       | C | Manufacture of other food products                                                 | 1,494.0    | 5 |
| 10.9       | C | Manufacture of prepared animal feeds                                               | 404.2      | 5 |
| 11.01-06   | C | Manufacture of alcoholic beverages, including spirits, wine, cider, beer and malt  | 1,463.6    | 5 |
| 11.07      | C | Manufacture of soft drinks: production of mineral waters and other bottled waters  | 130.2      | 5 |
| 20.15 /1   | C | Fertilisers                                                                        | 728.4      | 5 |
| 20.15 /2   | C | Other nitrogen compounds                                                           | 1,013.7    | 5 |
| 20.12+20.2 | C | Manufacture of dyestuffs, agro-chemicals                                           | 1,045.7    | 5 |
| 22.2       | C | Plastics products                                                                  | 2,975.5    | 5 |
| 56         | I | Food and beverage serving services                                                 | 2,672.2    | 5 |
| 35.1/1     | D | Electricity production - gas                                                       | 45,629.5   |   |
| 35.1/2     | D | Electricity production - coal                                                      | 20,029.8   |   |
| 35.1/3     | D | Electricity production - nuclear                                                   | 99.5       |   |
| 35.1/4     | D | Electricity production - oil                                                       | 124.6      |   |
| 35.1/5     | D | Electricity production - other                                                     | 16,658.2   |   |
| 36         | E | Natural water; water treatment and supply services                                 | 893.0      |   |
| 37         | E | Sewerage services; sewage sludge                                                   | 2,780.1    |   |
| 38         | E | Waste collection, treatment and disposal services; materials recovery services     | 22,532.4   |   |
|            |   | Food                                                                               | 65,549.4   |   |
|            |   | Clothes                                                                            | 15,786.8   |   |
|            |   | Travel                                                                             | 70,014.7   |   |
|            |   | Travel +                                                                           | 75,834.0   |   |
|            |   |                                                                                    |            |   |
|            |   | Total Travel                                                                       | 145,848.7  |   |
|            |   |                                                                                    |            |   |
|            |   | Total Food, clothes, travel                                                        | 227,184.9  |   |
|            |   |                                                                                    |            |   |
|            |   | Total UK                                                                           | 551,523.20 |   |
