# Supplementary material
Source: MDPI journal article supplement (https://www.mdpi.com/2071-1050/15/7/6004)
Supplement: s1 [file s1]

## Supplementary Material – Table S3

Mapping of SIC sectors to aggregate sectors in this study

| SIC product    |                                                                                                   | Sectors  |
|----------------|---------------------------------------------------------------------------------------------------|----------|
| 01             | Products of agriculture, hunting and related services                                             | Food     |
| 02             | Products of forestry, logging and related services                                                | Others   |
| 03             | Fish and other fishing products; aquaculture products; support services to fishing                | Food     |
| 05             | Coal and lignite                                                                                  | Energy   |
| 06&07          | Extraction Of Crude Petroleum And Natural Gas & Mining Of Metal Ores                              | Energy   |
| 08             | Other mining and quarrying products                                                               | Others   |
| 09             | Mining support services                                                                           | Others   |
| 10.1           | Preserved meat and meat products                                                                  | Food     |
| 10.2-3         | Processed and preserved fish, crustaceans, molluscs, fruit and vegetables                         | Food     |
| 10.4           | Vegetable and animal oils and fats                                                                | Food     |
| 10.5           | Dairy products                                                                                    | Food     |
| 10.6           | Grain mill products, starches and starch products                                                 | Food     |
| 10.7           | Bakery and farinaceous products                                                                   | Food     |
| 10.8           | Other food products                                                                               | Food     |
| 10.9           | Prepared animal feeds                                                                             | Food     |
| 11.01-6 and 12 | Alcoholic beverages & Tobacco products                                                            | Alcohol  |
| 11.07          | Soft drinks                                                                                       | Food     |
| 13             | Textiles                                                                                          | Clothing |
| 14             | Wearing apparel                                                                                   | Clothing |
| 15             | Leather and related products                                                                      | Clothing |
| 16             | Wood and of products of wood and cork, except furniture; articles of straw and plaiting materials | Others   |
| 17             | Paper and paper products                                                                          | Others   |
| 18             | Printing and recording services                                                                   | Others   |
| 19             | Coke and refined petroleum products                                                               | Energy   |
| 20A            | Industrial gases, inorganics and fertilisers (all inorganic chemicals) - 20.11/13/15              | Energy   |
| 20B            | Petrochemicals - 20.14/16/17/60                                                                   | Energy   |
| 20C            | Dyestuffs, agro-chemicals - 20.12/20                                                              | Others   |
| 20.3           | Paints, varnishes and similar coatings, printing ink and mastics                                  | Others   |
| 20.4           | Soap and detergents, cleaning and polishing preparations, perfumes and toilet preparations        | Others   |
| 20.5           | Other chemical products                                                                           | Others   |
| 21             | Basic pharmaceutical products and pharmaceutical preparations                                     | Others   |
| 22             | Rubber and plastic products                                                                       | Plastic  |
| 23OTHER        | Glass, refractory, clay, other porcelain and ceramic, stone and abrasive products - 23.1-4/7-9    | Others   |
| 23.5-6         | Cement, lime, plaster and articles of concrete, cement and plaster                                | Others   |
| 24.1-3         | Basic iron and steel                                                                              | Others   |
| 24.4-5         | Other basic metals and casting                                                                    | Others   |
| 25OTHER        | Fabricated metal products, excl. machinery and equipment and weapons & ammunition - 25.1-3/25.5-9 | Others   |
| 25.4           | Weapons and ammunition                                                                            | Others   |
| 26             | Computer, electronic and optical products                                                         | Others   |
| 27             | Electrical equipment                                                                              | Others   |
| 28             | Machinery and equipment n.e.c.                                                                    | Others   |
| 29             | Motor vehicles, trailers and semi-trailers                                                        | Others   |
| 30.1           | Ships and boats                                                                                   | Others   |
| 30.3           | Air and spacecraft and related machinery                                                          | Others   |
| 30OTHER        | Other transport equipment - 30.2/4/9                                                              | Others   |
| 31             | Furniture                                                                                         | Others   |
| 32             | Other manufactured goods                                                                          | Others   |
| 33.15          | Repair and maintenance of ships and boats                                                         | Others   |
| 33.16          | Repair and maintenance of aircraft and spacecraft                                                 | Others   |

|         |                                                                                                                                          |                |
|---------|------------------------------------------------------------------------------------------------------------------------------------------|----------------|
| 33OTHER | Rest of repair; Installation - 33.11-14/17/19/20                                                                                         | Others         |
| 35.1    | Electricity, transmission and distribution                                                                                               | Energy         |
| 35.2-3  | Gas; distribution of gaseous fuels through mains; steam and air conditioning supply                                                      | Energy         |
| 36      | Natural water; water treatment and supply services                                                                                       | Water          |
| 37      | Sewerage services; sewage sludge                                                                                                         | Waste          |
| 38      | Waste collection, treatment and disposal services; materials recovery services                                                           | Waste          |
| 39      | Remediation services and other waste management services                                                                                 | Waste          |
| 41-43   | Construction                                                                                                                             | Others         |
| 45      | Wholesale and retail trade and repair services of motor vehicles and motorcycles                                                         | Trade          |
| 46      | Wholesale trade services, except of motor vehicles and motorcycles                                                                       | Trade          |
| 47      | Retail trade services, except of motor vehicles and motorcycles                                                                          | Trade          |
| 49.1-2  | Rail transport services                                                                                                                  | Transport      |
| 49.3-5  | Land transport services and transport services via pipelines, excluding rail transport                                                   | Transport      |
| 50      | Water transport services                                                                                                                 | Transport      |
| 51      | Air transport services                                                                                                                   | Transport      |
| 52      | Warehousing and support services for transportation                                                                                      | Transport      |
| 53      | Postal and courier services                                                                                                              | Others         |
| 55      | Accommodation services                                                                                                                   | Hotel          |
| 56      | Food and beverage serving services                                                                                                       | Food           |
| 58      | Publishing services                                                                                                                      | Others         |
| 59-60   | Motion Picture, Video & TV Programme Production, Sound Recording & Music Publishing Activities & Programming And Broadcasting Activities | Others         |
| 61      | Telecommunications services                                                                                                              | Others         |
| 62      | Computer programming, consultancy and related services                                                                                   | Others         |
| 63      | Information services                                                                                                                     | Others         |
| 64      | Financial services, except insurance and pension funding                                                                                 | Others         |
| 65      | Insurance, reinsurance and pension funding services, except compulsory social security                                                   | Others         |
| 66      | Services auxiliary to financial services and insurance services                                                                          | Others         |
| 68.1-2  | Real estate services, excluding on a fee or contract basis and imputed rent                                                              | Others         |
| 68.2IMP | Owner-Occupiers' Housing Services                                                                                                        | Others         |
| 68.3    | Real estate services on a fee or contract basis                                                                                          | Others         |
| 69.1    | Legal services                                                                                                                           | Others         |
| 69.2    | Accounting, bookkeeping and auditing services; tax consulting services                                                                   | Others         |
| 70      | Services of head offices; management consulting services                                                                                 | Others         |
| 71      | Architectural and engineering services; technical testing and analysis services                                                          | Others         |
| 72      | Scientific research and development services                                                                                             | Others         |
| 73      | Advertising and market research services                                                                                                 | Others         |
| 74      | Other professional, scientific and technical services                                                                                    | Others         |
| 75      | Veterinary services                                                                                                                      | Others         |
| 77      | Rental and leasing services                                                                                                              | Rental service |
| 78      | Employment services                                                                                                                      | Others         |
| 79      | Travel agency, tour operator and other reservation services and related services                                                         | Travel agency  |
| 80      | Security and investigation services                                                                                                      | Others         |
| 81      | Services to buildings and landscape                                                                                                      | Others         |
| 82      | Office administrative, office support and other business support services                                                                | Others         |
| 84      | Public administration and defence services; compulsory social security services                                                          | Others         |
| 85      | Education services                                                                                                                       | Others         |
| 86      | Human health services                                                                                                                    | Others         |
| 87-88   | Residential Care & Social Work Activities                                                                                                | Others         |
| 90      | Creative, arts and entertainment services                                                                                                | Others         |
| 91      | Libraries, archives, museums and other cultural services                                                                                 | Others         |
| 92      | Gambling and betting services                                                                                                            | Others         |
| 93      | Sports services and amusement and recreation services                                                                                    | Others         |
| 94      | Services furnished by membership organisations                                                                                           | Others         |
| 95      | Repair services of computers and personal and household goods                                                                            | Others         |
| 96      | Other personal services                                                                                                                  | Others         |
| 97      | Services of households as employers of domestic personnel                                                                                | Others         |
